# Supplementary material
Source: PubMed Central journal article supplement (PMC4702222)
Supplement: CJN.02560315_CJN02560315SupplementaryData.pdf [file CJN.02560315_CJN02560315SupplementaryData.pdf]

## Complete Remission in the Nephrotic Syndrome Study Network

Debbie S Gipson MD<sup>1</sup>, Jonathan P Troost PhD<sup>1</sup>, Richard Lafayette MD<sup>2</sup>, Michelle A Hladunewich MD<sup>3</sup>, Howard Trachtman MD<sup>4</sup>, Crystal A Gadegbeku MD<sup>5</sup>, John R Sedor MD<sup>6</sup>, Lawrence B Holzman MD<sup>7</sup>, Marva M Moxey-Mims MD<sup>8</sup>, Kalyani Perumal MD<sup>9</sup>, Frederick J Kaskel MD<sup>10</sup>, Peter J Nelson MD<sup>11</sup>, Katherine R Tuttle MD<sup>11,12</sup>, Serena M Bagnasco MD<sup>13</sup>, Marie C Hogan MD, PhD<sup>14</sup>, Katherine M Dell MD<sup>15</sup>, Gerald B Appel MD<sup>16</sup>, John C. Lieske MD<sup>14</sup>, Titilayo O Ilori MD<sup>17</sup>, Christine B Sethna MD<sup>18</sup>, Fernando C Fervenza MD PhD<sup>14</sup>, Susan L Hogan PhD, MPH<sup>19</sup>, Patrick H Nachman MD<sup>19</sup>, Avi Z Rosenberg MD<sup>8,13</sup>, Larry A. Greenbaum MD, PhD<sup>20</sup>, Kevin E Meyers MBBCh<sup>21</sup>, Stephen M Hewitt MD PhD<sup>22</sup>, Michael J Choi MD<sup>23</sup>, Jeffrey B Kopp MD<sup>8</sup>, Olga Zhdanova MD<sup>24</sup>, Jeffrey B Hodgkin MD<sup>25</sup>, Duncan B Johnstone MD, PHD<sup>5</sup>, Sharon G Adler MD<sup>26</sup>, Carmen Avila-Casado MD<sup>27</sup>, Alicia M Neu MD<sup>28</sup>, Sangeeta R Hingorani MD<sup>29</sup>, Kevin V Lemley MD PhD<sup>30</sup>, Cynthia C Nast MD<sup>31</sup>, Tammy M Brady MD, PhD<sup>28</sup>, Laura Barisoni MD<sup>32</sup>, Alessia Fornoni MD PhD<sup>33</sup>, J. Charles Jennette MD<sup>34</sup>, Daniel C Cattran MD, FRCPC<sup>3</sup>, Matthew B Palmer MD PhD<sup>35</sup>, Keisha L Gibson MD<sup>36</sup>, Heather N Reich MD PHD<sup>3</sup>, Michele H Mokrzycki MD MS<sup>37</sup>, Kamalanathan K Sambandam MD<sup>38</sup>, Gaston E Zilleruelo MD<sup>39</sup>, Christoph Licht MD<sup>3,40</sup>, Matthew G Sampson<sup>1</sup>, Peter Song PhD<sup>41</sup>, Laura H Mariani MD<sup>42</sup>, Matthias Kretzler MD<sup>42</sup>

1. Department of Pediatrics, University of Michigan
2. Department of Medicine, Stanford University
3. Department of Medicine, University of Toronto
4. Department of Pediatrics, New York University Langone Medical Center
5. Department of Medicine, Temple University
6. Department of Medicine, Case Western Reserve University
7. Department of Internal Medicine, University of Pennsylvania
8. National Institute of Diabetes and Digestive and Kidney Diseases, National Institutes of Health
9. Department of Nephrology, John H. Stroger Hospital/University of Illinois at Chicago
10. Department of Pediatrics, Albert Einstein College of Medicine and Montefiore Medical Center
11. Department of Internal Medicine, University of Washington
12. Department of Medicine, Providence Health Care
13. Department of Pathology, Johns Hopkins University
14. Department of Internal Medicine, Mayo Clinic
15. Department of Pediatrics, Case Western Reserve University
16. Department of Medicine, Columbia University
17. Department of Medicine, Emory University
18. Department of Pediatrics, Cohen Children's Medical Center of New York
19. Department of Medicine, University of North Carolina at Chapel Hill
20. Department of Pediatrics, Emory University
21. Department of Pediatrics, Children's Hospital of Philadelphia

22. National Cancer Institute, National Institutes of Health
23. Department of Medicine, Johns Hopkins University
24. Department of Medicine, New York University Langone Medical Center
25. Department of Pathology, University of Michigan
26. Department of Medicine, Harbor-UCLA Medical Center
27. Department of Pathology, University of Toronto
28. Department of Pediatrics, Johns Hopkins University
29. Department of Pediatrics, Seattle Children's Hospital
30. Department of Pediatrics, Children's Hospital Los Angeles
31. Department of Pathology, Cedars-Sinai Medical Center
32. Department of Pathology, University of Miami
33. Department of Medicine, University of Miami
34. Department of Pathology and Laboratory Medicine, University of North Carolina at Chapel Hill
35. Department of Pathology, University of Pennsylvania
36. Departments of Medicine and Pediatrics, University of North Carolina at Chapel Hill
37. Department of Medicine, Albert Einstein College of Medicine and Montefiore Medical Center
38. Department of Internal Medicine, University of Texas Southwestern at Dallas
39. Department of Pediatrics, University of Miami
40. Department of Pediatrics, The Hospital for Sick Children
41. Department of Biostatistics, University of Michigan
42. Department of Internal Medicine, University of Michigan
